# Supplementary material for: Targeting the Homologous Recombination Pathway in Cancer With a Novel Class of RAD51 Inhibitors
Source: Front Oncol. 2022 May 13;12:885186. doi: 10.3389/fonc.2022.885186 (PMC9136011; doi:10.3389/fonc.2022.885186)
Supplement: Supplementary file 1 [file DataSheet_1.docx]

**Supplementary Materials for**

Targeting the homologous recombination pathway in cancer with a novel class of RAD51 inhibitors

Peng Gu1†, Liting Xue1†, Chunyan Zhao1, Wenjing Li1, Zhen Jiang1, Aiguo Liu1, Tingting Li1, Lu Liu1, Markus Decker1, Jinwen Shan1, Xiaoxuan Cheng2, Wenqing Yang1 & Renhong Tang1*

1State Key Laboratory of Translational Medicine and Innovative Drug Development, Jiangsu Simcere Pharmaceutical Co., Ltd., Nanjing, China

2Hangzhou foreign languages school, Hangzhou, China

†These authors have contributed equally to this work and share first authorship.

*** Correspondence:**Renhong Tang
renhong.tang@simceregroup.com

Keywords: RAD51, Small molecule inhibitor, DNA damage response, Homologous recombination, Synthetic lethality.

**Table S1. Cell lines and culture medium.**

| **Cell line** | **Culture medium** |
| --- | --- |
| Z-138 | IMEM +10% Horse Serum |
| Daudi | RPMI 1640 +10% FBS |
| Raji | RPMI 1640 +10% FBS |
| MDA-MB-468 | RPMI 1640 +10% FBS |
| MDA-MB-231 | RPMI 1640 +10% FBS |
| HCC-1937 | RPMI 1640 +10% FBS |
| MDA-MB-436 | DMEM +10% FBS |
| HuP-T4 | EMEM +10% FBS |
| KP-4 | RPMI 1640 +10% FBS |
| SKOV3 | McCoy's 5A + 10% FBS |
| NCI-H1563 | RPMI 1640 +10% FBS |
| HCC15 | RPMI 1640 +10% FBS |
| A549 | DMEM +10% FBS |
| H526 | RPMI 1640 +10% FBS |
| MIA PaCa-2 | DMEM +10% FBS + 2.5% Horse Serum |
| THP1 | RPMI 1640 +10% FBS + 0.05mM β-Mercaptoethanol |
| U937 | RPMI 1640 +10% FBS |
| NCI-H23 | RPMI 1640 +10% FBS |
| HCT 116 | McCoy's 5A + 10% FBS |

**Table S2. Antibody information and application.**

| **Antibody** | **Brand** | **Catalogue** | **Species** | **Application** | **Dilution** |
| --- | --- | --- | --- | --- | --- |
| Anti-RAD51 antibody | Abcam | ab63801 | Rabbit | IF, WB | 1:500, 1:1000 |
| Anti-γH2AX antibody | Millipore | 05-636 | Mouse | IF, IHC, WB | 1:500, 1:1000 |
| Anti-γH2AX antibody | Abcam | ab81299 | Rabbit | IHC | 1:200 |
| Anti-β-Tubulin antibody | Abcam | ab6046 | Rabbit | WB | 1:5000 |
| Anti-p-ATR(T1989) antibody | Abcam | ab227851 | Rabbit | WB | 1:1000 |
| p-Chk1(S345) | Abcam | ab58567 | Rabbit | WB | 1:1000 |
| IRF-1 | Abcam | ab186384 | Rabbit | WB | 1:5000 |
| PE anti-human PD-L1 Antibody | BioLegend | 393608 | Mouse | FC | 1:20 |
| Histone H3 | Cell Signaling | 4499S | Rabbit | WB | 1:5000 |
| Anti-Rabbit IgG H&L (Alexa Fluor® 488) | Abcam | ab150077 | Goat | IF | 1:1000 |
| Anti-Mouse IgG H&L (Alexa Fluor® 594) | Abcam | ab150116 | Goat | IF | 1:1000 |
| anti-Mouse IgG (H+L) Secondary Antibody, HRP | ThermoFisher | 31430 | Goat | WB | 1:5000 |
| anti-Rabbit IgG (H+L) Secondary Antibody, HRP | ThermoFisher | 31460 | Goat | WB | 1:5000 |

**
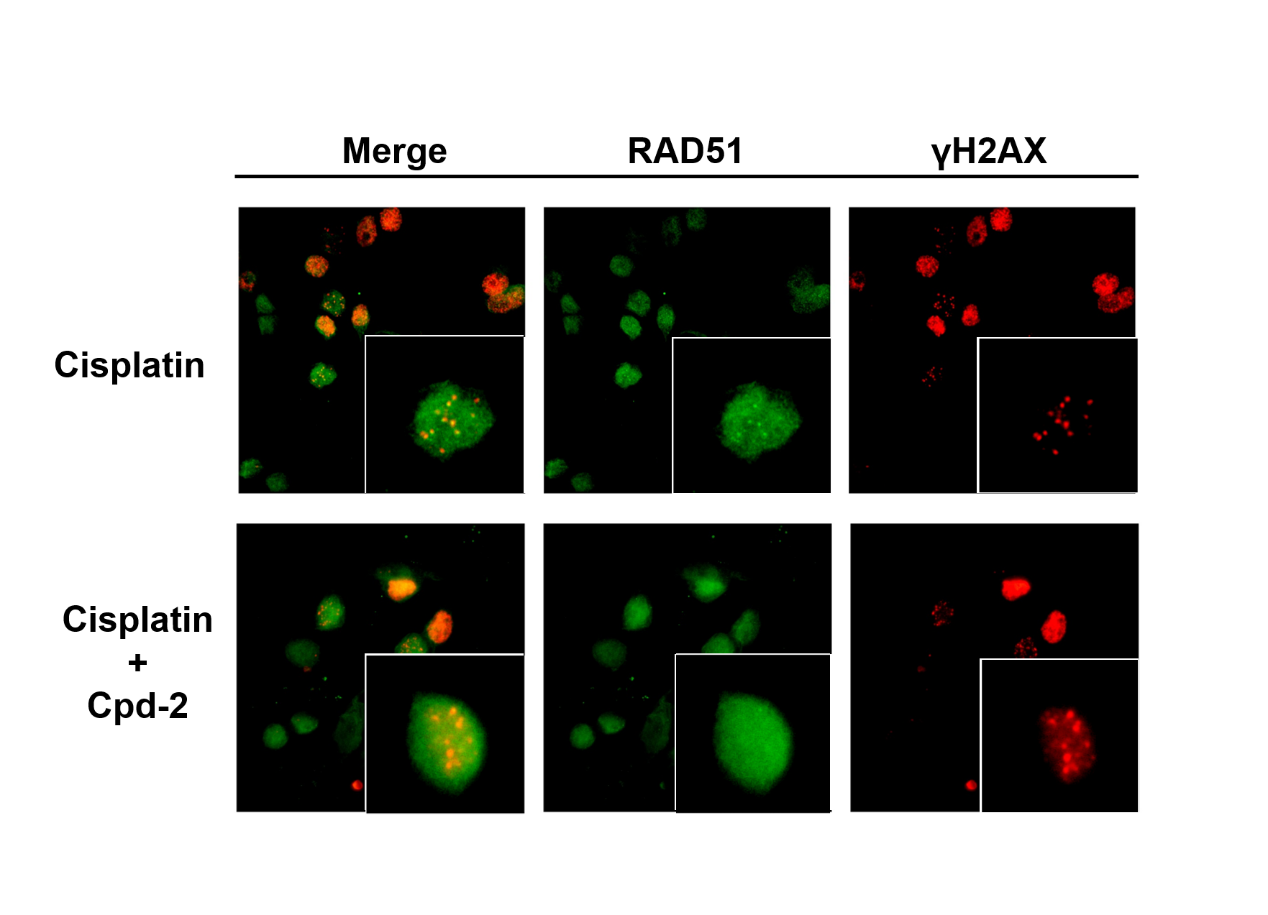
**

**Figure S1. RAD51 inhibitor inhibits foci formation in MDA-MB-468 cells.**

Image analysis of DNA damage and repair marker upon the compound treatment. MDA-MB-468 cells were treated with DMSO (upper panel) or Cpd-2 (10μM, lower panel) for 2 days, then cells were exposed to cisplatin (10μM) for 2 h (upper and lower panels) and stained 5 h later.


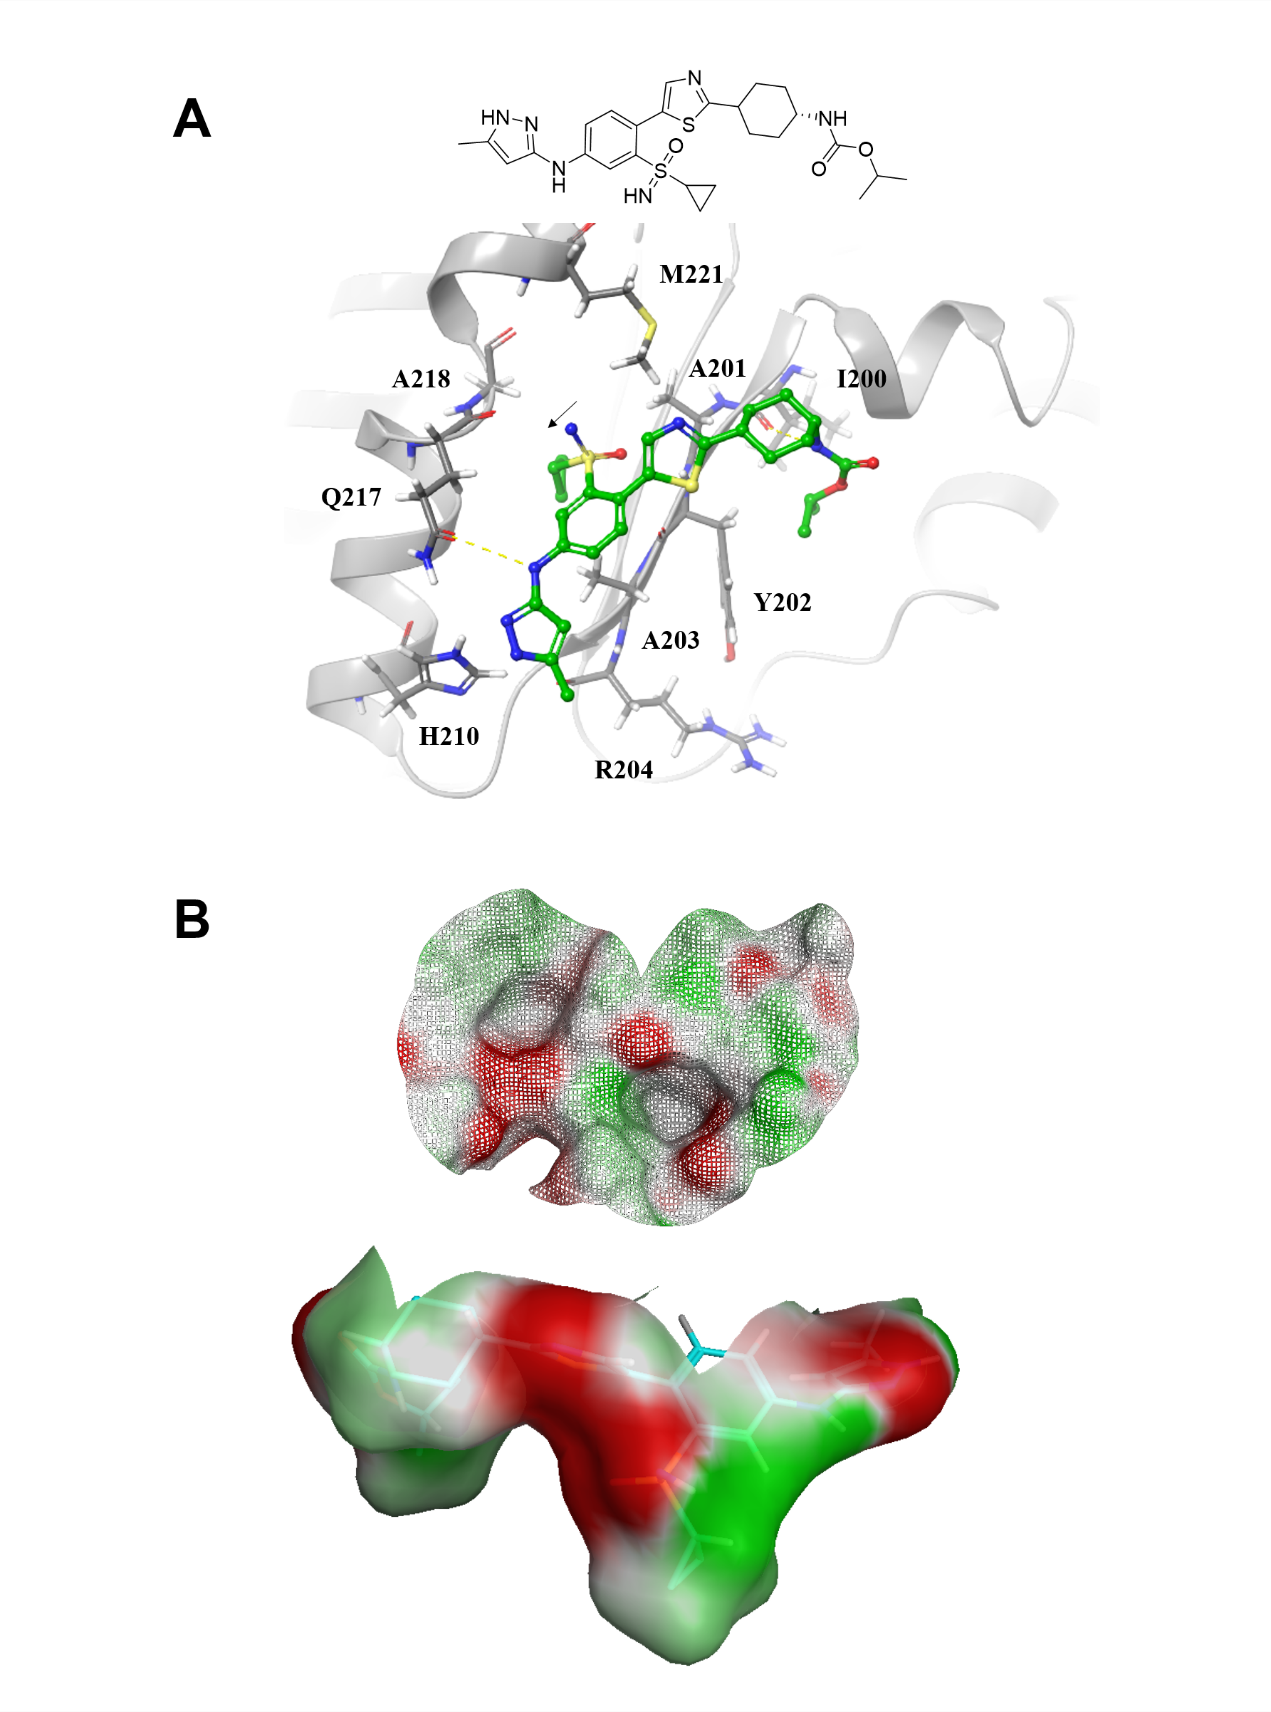


**Figure S2. Binding of RAD51 inhibitor to RAD51 protein.**

(A) The binding mode to RAD51 of Cpd-5.

(B) The analysis of the electrostatic potential of RAD51 pockets and Cpd-5.
